# Supplementary material for: Is there a direct solar proton impact on lower stratospheric ozone?
Source: Copernicus journal article supplement (doi:10.5194/acp-2020-273), 2020-05-12
Supplement: Supplementary file 1 [file acp-2020-273-supplement.pdf]

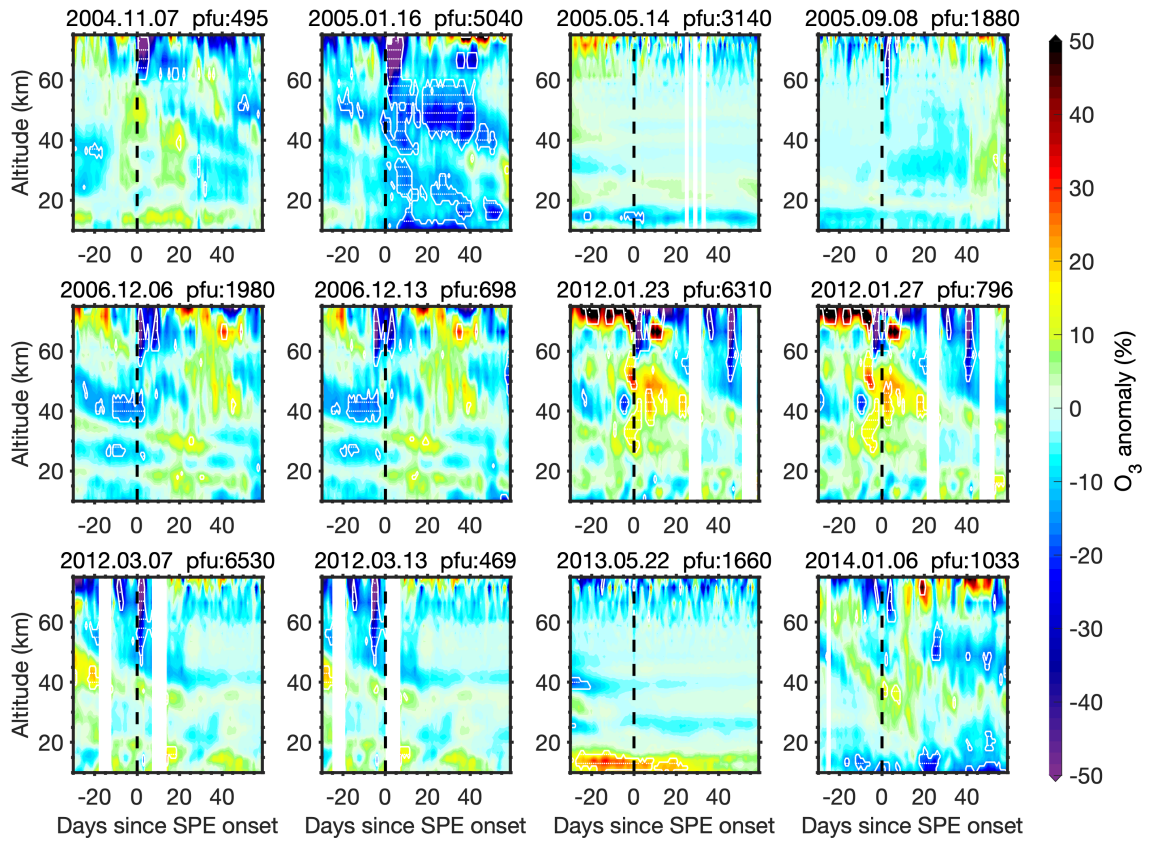

1

2

Figure S1. Same as Fig. 3 but the MLS ozone anomalies are reported as relative changes (%).

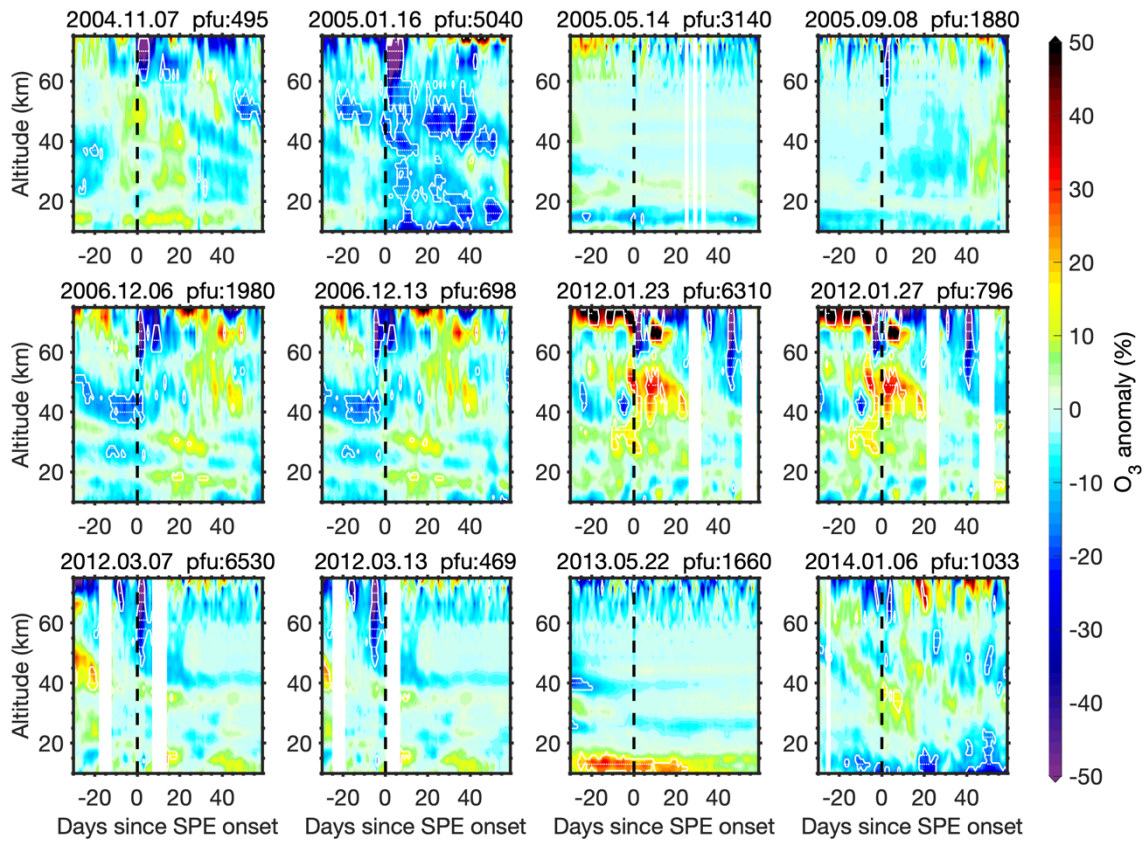

Figure S2. Same as Fig. S1 but the MLS ozone anomalies are calculated by subtracting a daily ozone climatology using median (instead of mean) values of MLS data from 2004 to date.
